# Supplementary material for: WHO priority pathogens, ESKAPE bacteria, and antimicrobial resistance surveillance in household wastewater, Gombe, Nigeria
Source: Access Microbiol. 2026 Jan 19;8(1):001100.v3. doi: 10.1099/acmi.0.001100.v3 (PMC12816226; doi:10.1099/acmi.0.001100.v3)
Supplement: Uncited Supplementary Material 1. [file acmi-8-01100-s001.xlsx]

## Sheet: Sheet1
District	Sample No	I.D Number	Gram Stain Reaction	Lactose Fermentation	Citrate	Methyl Red Test	Oxidase Test	Motility Test	Indole Test	Urease Test	Slant	Butt	Gas	H2S Production	Bacterial Species	AUG	CTX	IMP	OFX	GN	NA	NF	CXM	CRO	ACX	ZEM	LBC	Resistance Pattern	MDR Status	Number of Resistant Antibiotics (a)	Total Antibiotics Used (b)	Multiple Antibiotic Resistance(MAR) INDEX
Dawaki	D001	D001	-	+	+	-	-	+	-	-	Y	Y	-	-	Enterobacter spp	S	S	S	R	R	S	S	I	S	S	S	S	Non-MDR	NO	2	12	0.2
Dawaki	D002	D002	-	-	-	+	-	+	-	-	R	Y	w	-	Salmonella spp	R	R	R	S	S	R	R	R	R	S	R	S	MDR	YES	8	12	0.7
Dawaki	D003	D003	-	-	+	-	+	+	-	+	R	Y	-	-	Pseudomonas aeruginosa	R	R	R	S	R	R	R	S	R	R	R	S	MDR	YES	9	12	0.8
Dawaki	D004	D004	-	-	-	+	-	+	-	-	R	Y	w	-	Salmonella spp	S	I	I	S	I	I	I	S	S	I	I	S	Non-MDR	NO	0	12	0
Dawaki	D005	D005	-	-	+	-	+	+	-	+	R	Y	-	-	Pseudomonas aeruginosa	R	R	R	R	I	R	R	R	R	R	R	R	MDR	YES	11	12	0.9
Dawaki	D006	D006	-	+	-	+	-	+	+	-	Y	Y	-	+	E. coli	R	I	R	R	R	R	R	S	R	I	S	S	MDR	YES	7	12	0.6
Dawaki	D007	D007	-	-	-	+	-	+	-	-	R	Y	w	-	Salmonella spp	R	R	R	R	S	R	R	R	S	R	R	S	MDR	YES	9	12	0.8
Dawaki	D008	D008	-	+	+	-	-	-	-	w	Y	Y	-	+	Klebsiella oxytoca	R	R	R	S	S	R	R	R	I	R	R	S	MDR	YES	8	12	0.7
Dawaki	D009	D009	-	-	+	-	+	+	-	-	R	Y	-	-	Pseudomonas aeruginosa	R	R	R	R	R	S	R	R	R	R	R	S	MDR	YES	10	12	0.8
Dawaki	D010	D010	-	+	-	+	-	+	+	-	Y	Y	-	+	E. coli	R	R	R	S	I	R	R	R	I	R	R	S	MDR	YES	8	12	0.7
Dawaki	D011	D011	-	+	+	-	-	-	-	-	Y	Y	-	+	Klebsiella pneumoniae	R	R	R	R	R	I	I	R	I	I	R	S	MDR	YES	6	12	0.5
Dawaki	D012	D012	-	+	+	-	-	-	-	-	Y	Y	-	+	Klebsiella pneumoniae	I	R	I	S	S	I	I	I	S	I	I	S	Non-MDR	NO	1	12	0.1
Dawaki	D013	D013	-	+	-	+	-	+	+	-	Y	Y	-	+	E. coli	R	R	R	S	R	R	R	R	R	R	R	S	MDR	YES	10	12	0.8
Dawaki	D014	D014	-	+	+	-	-	-	-	-	Y	Y	-	+	Klebsiella pneumoniae	R	R	R	S	I	R	R	R	R	R	R	R	MDR	YES	10	12	0.8
Dawaki	D015	D015	-	+	+	-	-	-	-	w	Y	Y	-	+	Klebsiella oxytoca	R	R	R	S	R	R	R	R	R	R	R	S	MDR	YES	10	12	0.8
Dawaki	D016	D016	-	-	+	+	-	+	+	+	R	Y	+	+	Proteus vulgaris	I	R	R	I	R	R	R	R	R	R	R	R	MDR	YES	10	12	0.8
Dawaki	D017	D017	-	+	+	-	-	+	-	-	Y	Y	-	-	Enterobacter spp	R	R	R	R	R	R	R	R	R	R	R	S	MDR	YES	11	12	0.9
Dawaki	D018	D018	-	+	-	+	-	+	+	-	Y	Y	-	+	E. coli	R	R	I	I	I	R	I	R	S	S	S	S	MDR	YES	4	12	0.3
Dawaki	D019	D019	-	-	-	+	-	+	-	-	R	Y	w	-	Salmonella spp	R	R	R	S	R	R	R	R	R	R	R	S	MDR	YES	10	12	0.8
Dawaki	D020	D020	-	-	+	-	+	+	-	-	R	Y	-	-	Pseudomonas aeruginosa	R	R	R	S	R	R	R	R	R	R	R	S	MDR	YES	10	12	0.8
Dawaki	D021	D021	-	-	-	+	-	+	-	-	R	Y	w	-	Salmonella spp	R	I	R	S	R	I	R	R	I	R	R	S	MDR	YES	7	12	0.6
Dawaki	D022	D022	-	-	+	-	+	+	-	+	R	Y	-	-	Pseudomonas aeruginosa	R	R	R	R	S	R	R	R	S	R	R	S	MDR	YES	9	12	0.8
Dawaki	D023	D023	-	-	+	+	-	+	-	+	R	Y	+	+	Proteus mirabilis	R	I	R	R	S	R	R	R	R	R	R	S	MDR	YES	9	12	0.8
Dawaki	D024	D024	-	-	-	+	-	+	-	-	R	Y	w	-	Salmonella spp	S	I	R	R	S	R	R	R	S	S	S	S	MDR	YES	5	12	0.4
Dawaki	D025	D025	-	+	-	+	-	+	+	-	Y	Y	-	+	E. coli	I	R	R	R	I	R	R	R	R	I	S	R	MDR	YES	8	12	0.7
Dawaki	D026	D026	-	-	+	-	+	+	-	+	R	Y	-	-	Pseudomonas aeruginosa	S	I	I	R	R	I	R	R	I	S	I	S	Non-MDR	NO	4	12	0.3
Dawaki	D027	D027	-	-	+	-	+	+	-	+	R	Y	-	-	Pseudomonas aeruginosa	S	R	I	I	I	S	R	R	S	S	S	S	MDR	YES	3	12	0.3
Dawaki	D028	D028	-	-	-	+	-	-	-	-	R	Y	-	-	Shigella spp	S	S	S	S	S	I	S	S	S	S	S	S	Non-MDR	NO	0	12	0
Dawaki	D029	D029	-	-	+	+	-	+	+	+	R	Y	+	+	Proteus vulgaris	R	I	R	R	I	R	R	R	R	R	R	S	MDR	YES	9	12	0.8
Dawaki	D030	D030	-	-	+	-	+	+	-	+	R	Y	-	-	Pseudomonas aeruginosa	R	S	R	S	R	R	I	R	R	S	R	R	MDR	YES	8	12	0.7
Dawaki	D031	D031	-	+	+	-	-	-	-	-	Y	Y	-	+	Klebsiella pneumoniae	R	R	R	S	S	R	R	R	R	R	R	S	MDR	YES	9	12	0.8
Dawaki	D032	D032	-	+	+	-	-	-	-	-	Y	Y	-	+	Klebsiella pneumoniae	R	S	R	R	R	R	R	R	R	R	R	S	MDR	YES	10	12	0.8
Dawaki	D033	D033	-	+	-	+	-	+	+	-	Y	Y	-	+	E. coli	R	R	R	R	R	R	R	R	R	R	I	S	MDR	YES	10	12	0.8
Dawaki	D034	D034	-	+	+	-	-	+	-	-	Y	Y	-	-	Enterobacter spp	R	R	I	S	I	R	R	R	R	R	R	S	MDR	YES	8	12	0.7
Dawaki	D035	D035	-	-	-	+	-	+	-	-	R	Y	w	-	Salmonella spp	R	R	R	R	S	R	R	R	R	R	R	S	MDR	YES	10	12	0.8
Dawaki	D036	D036	-	+	-	+	-	+	+	-	Y	Y	-	+	E. coli	R	R	R	I	I	I	R	R	R	R	R	R	MDR	YES	9	12	0.8
Dawaki	D037	D037	-	+	-	+	-	+	+	-	Y	Y	-	+	E. coli	R	S	R	R	R	R	R	S	R	R	R	S	MDR	YES	9	12	0.8
Dawaki	D038	D038	-	-	-	+	-	-	-	-	R	Y	-	-	Shigella spp	R	S	R	S	R	I	R	R	R	R	R	S	MDR	YES	8	12	0.7
Dawaki	D039	D039	-	-	-	+	-	+	-	-	R	Y	w	-	Salmonella spp	S	S	S	S	S	S	S	S	S	S	S	S	Non-MDR	NO	0	12	0
Dawaki	D040	D040	-	+	-	+	-	+	+	-	Y	Y	-	+	E. coli	I	R	R	S	S	R	R	I	I	R	R	S	MDR	YES	6	12	0.5
Dawaki	D041	D041	-	+	-	+	-	+	+	-	Y	Y	-	+	E. coli	R	R	R	S	I	R	R	R	R	R	R	S	MDR	YES	9	12	0.8
Dawaki	D007	D042	-	+	+	-	-	-	-	-	Y	Y	-	+	Klebsiella pneumoniae	R	R	R	S	I	S	I	I	R	R	R	S	MDR	YES	6	12	0.5
Dawaki	D016	D043	-	+	-	+	-	+	+	-	Y	Y	-	+	E. coli	R	R	R	S	S	R	R	S	R	I	I	S	MDR	YES	6	12	0.5
Dawaki	D025	D044	-	-	-	+	-	+	-	-	R	Y	w	-	Salmonella spp	R	R	I	S	I	R	R	S	I	S	S	S	Non-MDR	NO	4	12	0.3
Dawaki	D030	D045	-	-	+	+	-	+	+	+	R	Y	+	+	Proteus vulgaris	I	R	I	S	R	R	R	I	R	R	R	S	MDR	YES	7	12	0.6
Dawaki	D033	D046	-	+	-	+	-	+	+	w	Y	Y	-	+	Klebsiella oxytoca	R	R	S	S	S	I	I	R	R	R	R	S	MDR	YES	6	12	0.5
Dawaki	D038	D047	-	+	-	+	-	+	+	-	Y	Y	-	+	E. coli	R	R	R	S	R	R	R	R	R	R	R	S	MDR	YES	10	12	0.8
Dawaki	D040	D048	-	+	-	+	-	+	+	w	Y	Y	-	+	Klebsiella oxytoca	R	R	I	S	S	R	I	I	S	R	R	S	MDR	YES	5	12	0.4
Herwagana	H001	H001	-	+	-	+	-	+	+	-	Y	Y	-	+	E. coli	R	R	R	R	R	R	R	R	R	R	R	R	MDR	YES	12	12	1
Herwagana	H002	H002	-	-	-	+	-	+	-	-	R	Y	w	-	Salmonella spp	R	R	R	I	S	R	R	R	R	R	I	R	MDR	YES	9	12	0.8
Herwagana	H003	H003	-	-	+	+	-	+	-	+	R	Y	+	+	Proteus mirabilis	R	R	R	R	I	R	R	R	R	R	R	S	MDR	YES	10	12	0.8
Herwagana	H004	H004	-	-	+	+	-	+	-	+	R	Y	+	+	Proteus mirabilis	R	R	R	I	R	R	R	R	R	R	R	R	MDR	YES	11	12	0.9
Herwagana	H005	H005	-	+	-	+	-	+	+	-	Y	Y	-	+	E. coli	R	R	R	I	I	R	R	R	R	R	R	R	MDR	YES	10	12	0.8
Herwagana	H006	H006	-	-	-	+	-	-	-	-	R	Y	-	-	Shigella spp	R	R	R	R	R	R	R	R	R	R	R	R	MDR	YES	12	12	1
Herwagana	H007	H007	-	+	-	+	-	+	+	-	Y	Y	-	+	E. coli	R	R	R	I	S	R	R	R	R	R	R	S	MDR	YES	9	12	0.8
Herwagana	H008	H008	-	+	-	+	-	+	+	-	Y	Y	-	+	E. coli	R	S	S	I	S	R	R	R	I	R	R	S	MDR	YES	6	12	0.5
Herwagana	H009	H009	-	-	-	+	-	+	-	-	R	Y	w	-	Salmonella spp	R	R	R	I	R	R	R	R	R	R	R	R	MDR	YES	11	12	0.9
Herwagana	H010	H010	-	+	-	+	-	+	+	-	Y	Y	-	+	Klebsiella pneumoniae	R	R	R	R	S	R	R	I	R	R	I	S	MDR	YES	8	12	0.7
Herwagana	H011	H011	-	+	-	+	-	+	+	-	Y	Y	-	+	Klebsiella pneumoniae	R	R	R	R	R	R	R	R	R	R	R	S	MDR	YES	11	12	0.9
Herwagana	H012	H012	-	+	+	-	-	+	-	-	Y	Y	-	-	Enterobacter spp	R	R	R	R	S	R	R	R	R	R	R	S	MDR	YES	10	12	0.8
Herwagana	H013	H013	-	-	-	+	-	+	-	-	R	Y	w	-	Salmonella spp	R	R	R	R	I	R	R	R	R	R	I	S	MDR	YES	9	12	0.8
Herwagana	H014	H014	-	+	-	+	-	+	+	-	Y	Y	-	+	E. coli	R	R	R	I	S	R	R	I	R	R	R	S	MDR	YES	8	12	0.7
Herwagana	H015	H015	-	+	-	+	-	+	+	-	Y	Y	-	+	E. coli	R	R	R	S	S	R	R	R	R	R	R	S	MDR	YES	9	12	0.8
Herwagana	H016	H016	-	+	-	+	-	+	+	-	Y	Y	-	+	E. coli	R	R	R	S	S	R	R	R	R	R	R	S	MDR	YES	9	12	0.8
Herwagana	H017	H017	-	+	-	+	-	+	+	w	Y	Y	-	+	Klebsiella oxytoca	R	R	R	R	I	R	R	I	R	R	R	S	MDR	YES	9	12	0.8
Herwagana	H018	H018	-	-	-	+	-	+	-	-	R	Y	w	-	Salmonella spp	R	R	R	I	R	R	R	R	R	R	R	S	MDR	YES	10	12	0.8
Herwagana	H019	H019	-	-	+	-	+	+	-	+	R	Y	-	-	Pseudomonas aeruginosa	R	R	R	S	S	R	R	R	R	R	R	S	MDR	YES	9	12	0.8
Herwagana	H020	H020	-	-	+	-	+	+	-	+	R	Y	-	-	Pseudomonas aeruginosa	R	R	R	S	S	R	R	R	R	R	R	S	MDR	YES	9	12	0.8
Herwagana	H021	H021	-	+	-	+	-	+	+	-	Y	Y	-	+	Klebsiella pneumoniae	R	R	R	R	S	R	R	R	R	R	R	S	MDR	YES	10	12	0.8
Herwagana	H022	H022	-	+	-	+	-	+	+	-	Y	Y	-	+	Klebsiella pneumoniae	R	R	R	R	R	R	R	R	R	R	R	S	MDR	YES	11	12	0.9
Herwagana	H023	H023	-	+	-	+	-	+	+	-	Y	Y	-	+	E. coli	R	R	R	R	I	R	R	R	R	R	R	S	MDR	YES	10	12	0.8
Herwagana	H024	H024	-	+	-	+	-	+	+	-	Y	Y	-	+	Klebsiella pneumoniae	R	R	R	R	R	R	R	R	I	R	R	S	MDR	YES	10	12	0.8
Herwagana	H025	H025	-	+	-	+	-	+	+	-	Y	Y	-	+	E. coli	R	R	R	R	R	R	S	R	R	R	R	R	MDR	YES	11	12	0.9
Herwagana	H026	H026	-	+	-	+	-	+	+	-	Y	Y	-	+	E. coli	R	R	R	R	R	R	R	R	R	R	R	R	MDR	YES	12	12	1
Herwagana	H027	H027	-	+	+	-	-	+	-	-	Y	Y	-	-	Enterobacter spp	R	R	R	R	R	R	R	R	R	R	R	S	MDR	YES	11	12	0.9
Herwagana	H028	H028	-	+	-	+	-	+	+	-	Y	Y	-	+	Klebsiella pneumoniae	R	R	R	R	R	R	R	R	R	R	R	R	MDR	YES	12	12	1
Herwagana	H029	H029	-	-	+	-	+	+	-	+	R	Y	-	-	Pseudomonas aeruginosa	R	R	R	S	R	R	R	R	I	R	R	S	MDR	YES	9	12	0.8
Herwagana	H030	H030	-	+	-	+	-	+	+	-	Y	Y	-	+	Klebsiella pneumoniae	R	R	R	R	R	R	R	R	R	R	R	S	MDR	YES	11	12	0.9
Herwagana	H031	H031	-	-	+	-	+	+	-	+	R	Y	-	-	Pseudomonas aeruginosa	R	I	I	R	I	R	R	I	R	R	R	I	MDR	YES	7	12	0.6
Herwagana	H032	H032	-	+	-	+	-	+	+	-	Y	Y	-	+	E. coli	R	R	R	R	R	R	R	R	R	R	R	R	MDR	YES	12	12	1
Herwagana	H033	H033	-	+	-	+	-	+	+	-	Y	Y	-	+	E. coli	R	I	R	I	S	R	R	I	R	R	R	I	MDR	YES	7	12	0.6
Herwagana	H034	H034	-	-	-	+	-	-	-	-	R	Y	-	-	Shigella spp	R	R	I	R	R	R	R	R	R	R	R	I	MDR	YES	10	12	0.8
Herwagana	H035	H035	-	+	-	+	-	+	+	-	Y	Y	-	+	E. coli	I	S	I	S	S	R	R	I	R	I	R	S	Non-MDR	NO	4	12	0.3
Herwagana	H036	H036	-	+	-	+	-	+	+	w	Y	Y	-	+	Klebsiella oxytoca	R	I	R	R	R	R	R	R	R	R	R	S	MDR	YES	10	12	0.8
Herwagana	H037	H037	-	-	+	-	+	+	-	+	R	Y	-	-	Pseudomonas aeruginosa	R	R	R	R	R	R	R	R	R	R	R	R	MDR	YES	12	12	1
Herwagana	H038	H038	-	-	+	-	+	+	-	+	R	Y	-	-	Pseudomonas aeruginosa	R	R	R	R	R	R	R	R	R	R	R	S	MDR	YES	11	12	0.9
Herwagana	H039	H039	-	-	-	+	-	+	-	-	R	Y	w	-	Salmonella spp	R	R	R	R	I	R	R	R	R	R	R	S	MDR	YES	10	12	0.8
Herwagana	H040	H040	-	-	+	-	+	+	-	+	R	Y	-	-	Pseudomonas aeruginosa	R	R	R	R	R	R	R	R	R	R	R	S	MDR	YES	11	12	0.9
Herwagana	H041	H041	-	-	+	-	+	+	-	+	R	Y	-	-	Pseudomonas aeruginosa	R	R	R	R	R	R	R	R	R	R	R	S	MDR	YES	11	12	0.9
Herwagana	H042	H042	-	+	-	+	-	+	+	-	Y	Y	-	+	E. coli	R	R	R	S	R	R	R	R	R	R	R	S	MDR	YES	11	12	0.9
Herwagana	H006	H043	-	+	-	+	-	+	+	-	Y	Y	-	+	E. coli	R	S	S	I	I	S	S	S	S	S	S	S	Non-MDR	NO	1	12	0.1
Herwagana	H011	H044	-	+	-	+	-	+	+	-	Y	Y	-	+	E. coli	R	R	R	S	R	R	R	R	R	R	R	S	MDR	YES	10	12	0.8
Herwagana	H019	H045	-	+	-	+	-	+	+	-	Y	Y	-	+	Klebsiella pneumoniae	R	R	R	R	S	R	R	I	R	R	I	S	MDR	YES	8	12	0.7
Herwagana	H025	H046	-	-	-	+	-	+	-	-	R	Y	w	-	Salmonella spp	R	R	R	S	S	R	R	R	R	S	R	S	MDR	YES	8	12	0.7
Herwagana	H031	H047	-	+	-	+	-	+	+	-	Y	Y	-	+	E. coli	R	I	R	R	R	R	R	S	R	I	S	S	MDR	YES	7	12	0.6
Herwagana	H035	H048	-	+	-	+	-	+	+	-	Y	Y	-	+	Klebsiella pneumoniae	R	R	R	R	S	R	R	I	R	R	I	S	MDR	YES	8	12	0.7
Herwagana	H039	H049	-	+	-	+	-	+	+	-	Y	Y	-	+	E. coli	R	R	R	S	R	R	R	R	R	R	R	S	MDR	YES	10	12	0.8
Kumbiya Kumbiya	K001	K001	-	-	+	+	-	+	+	+	R	Y	+	+	Proteus vulgaris	R	R	R	S	S	R	R	I	I	R	R	S	MDR	YES	7	12	0.6
Kumbiya Kumbiya	K002	K002	-	-	+	-	+	+	-	+	R	Y	-	-	Pseudomonas aeruginosa	R	R	R	S	S	R	I	R	R	R	R	S	MDR	YES	8	12	0.7
Kumbiya Kumbiya	K003	K003	-	-	+	-	+	+	-	+	R	Y	-	-	Pseudomonas aeruginosa	S	S	S	S	S	R	R	R	R	S	S	S	MDR	YES	4	12	0.3
Kumbiya Kumbiya	K004	K004	-	+	-	+	-	+	+	-	Y	Y	-	+	E. coli	R	S	S	S	S	S	R	R	S	R	R	S	MDR	YES	5	12	0.4
Kumbiya Kumbiya	K005	K005	-	+	+	-	-	+	-	-	Y	Y	-	-	Enterobacter spp	S	S	S	S	S	S	S	S	S	S	S	S	Non-MDR	NO	0	12	0
Kumbiya Kumbiya	K006	K006	-	+	-	+	-	+	+	-	Y	Y	-	+	E. coli	R	S	S	S	S	S	R	R	S	S	R	S	Non-MDR	NO	4	12	0.3
Kumbiya Kumbiya	K007	K007	-	+	-	+	-	+	+	-	Y	Y	-	+	Klebsiella pneumoniae	R	R	S	S	S	S	S	R	R	R	R	S	MDR	YES	6	12	0.5
Kumbiya Kumbiya	K008	K008	-	-	-	+	-	+	-	-	R	Y	w	-	Salmonella spp	S	S	S	R	S	R	S	S	R	S	S	R	Non-MDR	NO	4	12	0.3
Kumbiya Kumbiya	K009	K009	-	-	-	+	-	-	-	-	R	Y	-	-	Shigella spp	S	I	I	S	S	I	S	I	R	I	I	S	Non-MDR	NO	1	12	0.1
Kumbiya Kumbiya	K010	K010	-	-	+	+	-	+	-	+	R	Y	+	+	Proteus mirabilis	R	R	R	R	S	R	R	S	R	R	R	S	MDR	YES	9	12	0.8
Kumbiya Kumbiya	K011	K011	-	+	-	+	-	+	+	w	Y	Y	-	+	Klebsiella oxytoca	S	R	R	R	S	R	R	S	S	S	I	S	MDR	YES	5	12	0.4
Kumbiya Kumbiya	K012	K012	-	-	+	+	-	+	+	+	R	Y	+	+	Proteus vulgaris	R	R	S	R	S	S	S	R	R	I	S	S	MDR	YES	5	12	0.4
Kumbiya Kumbiya	K013	K013	-	+	-	+	-	+	+	-	Y	Y	-	+	E. coli	R	S	I	S	R	I	I	R	R	R	I	S	MDR	YES	5	12	0.4
Kumbiya Kumbiya	K014	K014	-	+	-	+	-	+	+	-	Y	Y	-	+	Klebsiella pneumoniae	R	S	S	R	S	S	S	S	S	I	S	S	Non-MDR	NO	2	12	0.2
Kumbiya Kumbiya	K015	K015	-	+	-	+	-	+	+	-	Y	Y	-	+	E. coli	R	S	R	S	S	S	R	R	R	R	R	S	MDR	YES	7	12	0.6
Kumbiya Kumbiya	K016	K016	-	+	-	+	-	+	+	-	Y	Y	-	+	E. coli	S	S	I	S	I	I	I	S	I	S	I	S	Non-MDR	NO	0	12	0
Kumbiya Kumbiya	K017	K017	-	-	+	-	+	+	-	+	R	Y	-	-	Pseudomonas aeruginosa	I	I	I	S	S	S	S	R	R	I	R	S	Non-MDR	NO	3	12	0.3
Kumbiya Kumbiya	K018	K018	-	-	-	+	-	+	-	-	R	Y	w	-	Salmonella spp	R	R	R	S	S	R	R	R	R	R	R	S	MDR	YES	9	12	0.8
Kumbiya Kumbiya	K019	K019	-	-	-	+	-	-	-	-	R	Y	-	-	Shigella spp	S	R	S	S	S	S	S	S	S	S	S	S	Non-MDR	NO	1	12	0.1
Kumbiya Kumbiya	K020	K020	-	+	-	+	-	+	+	-	Y	Y	-	+	E. coli	R	R	R	R	S	R	R	R	R	R	R	S	MDR	YES	10	12	0.8
Kumbiya Kumbiya	K021	K021	-	+	-	+	-	+	+	-	Y	Y	-	+	E. coli	S	S	I	S	S	S	S	S	S	S	S	S	Non-MDR	NO	0	12	0
Kumbiya Kumbiya	K022	K022	-	-	+	-	+	+	-	+	R	Y	-	-	Pseudomonas aeruginosa	I	I	I	R	S	S	I	I	I	I	I	S	Non-MDR	NO	1	12	0.1
Kumbiya Kumbiya	K023	K023	-	+	-	+	-	+	+	-	Y	Y	-	+	E. coli	R	R	R	R	S	R	R	R	R	R	R	S	MDR	YES	10	12	0.8
Kumbiya Kumbiya	K024	K024	-	-	-	+	-	+	-	-	R	Y	w	-	Salmonella spp	S	S	S	S	S	R	R	S	S	S	S	S	Non-MDR	NO	2	12	0.2
Kumbiya Kumbiya	K025	K025	-	+	-	+	-	+	+	-	Y	Y	-	+	Klebsiella pneumoniae	R	R	S	S	S	I	R	R	S	R	R	S	MDR	YES	6	12	0.5
Kumbiya Kumbiya	K026	K026	-	+	-	+	-	+	+	-	Y	Y	-	+	Klebsiella pneumoniae	I	R	R	S	S	R	R	R	R	R	R	S	MDR	YES	8	12	0.7
Kumbiya Kumbiya	K027	K027	-	+	-	+	-	+	+	-	Y	Y	-	+	Klebsiella pneumoniae	R	S	S	S	S	S	R	S	S	R	S	S	Non-MDR	NO	3	12	0.3
Kumbiya Kumbiya	K028	K028	-	+	-	+	-	+	+	-	Y	Y	-	+	Klebsiella pneumoniae	S	S	S	S	S	S	S	S	S	S	S	S	Non-MDR	NO	0	12	0
Kumbiya Kumbiya	K029	K029	-	+	-	+	-	+	+	-	Y	Y	-	+	E. coli	S	S	S	R	I	S	R	S	R	S	S	S	Non-MDR	NO	3	12	0.3
Kumbiya Kumbiya	K030	K030	-	-	-	+	-	-	-	-	R	Y	-	-	Shigella spp	S	S	S	S	S	S	I	S	R	S	S	S	Non-MDR	NO	1	12	0.1
Kumbiya Kumbiya	K031	K031	-	-	+	-	+	+	-	+	R	Y	-	-	Pseudomonas aeruginosa	S	S	S	S	S	S	R	S	I	S	S	S	Non-MDR	NO	1	12	0.1
Kumbiya Kumbiya	K032	K032	-	+	-	+	-	+	+	-	Y	Y	-	+	E. coli	R	R	R	R	S	R	R	R	R	R	R	S	MDR	YES	10	12	0.8
Kumbiya Kumbiya	K033	K033	-	+	-	+	-	+	+	-	Y	Y	-	+	E. coli	R	R	S	S	S	S	R	S	S	S	S	S	MDR	YES	3	12	0.3
Kumbiya Kumbiya	K034	K034	-	+	-	+	-	+	+	-	Y	Y	-	+	Klebsiella pneumoniae	R	R	S	S	S	R	R	R	R	R	R	S	MDR	YES	8	12	0.7
Kumbiya Kumbiya	K035	K035	-	+	-	+	-	+	+	w	Y	Y	-	+	Klebsiella oxytoca	R	R	R	R	S	I	R	R	I	R	R	S	MDR	YES	8	12	0.7
Kumbiya Kumbiya	K036	K036	-	-	+	-	+	+	-	+	R	Y	-	-	Pseudomonas aeruginosa	S	R	S	S	S	R	R	S	S	S	S	S	MDR	YES	3	12	0.3
Kumbiya Kumbiya	K037	K037	-	-	+	+	-	+	+	+	R	Y	+	+	Proteus vulgaris	S	S	S	S	S	S	S	S	S	S	S	S	Non-MDR	NO	0	12	0
Kumbiya Kumbiya	K038	K038	-	+	+	-	-	+	-	-	Y	Y	-	-	Enterobacter spp	S	S	S	S	S	S	S	S	S	S	S	S	Non-MDR	NO	0	12	0
Kumbiya Kumbiya	K039	K039	-	+	-	+	-	+	+	w	Y	Y	-	+	Klebsiella oxytoca	I	R	I	I	S	I	I	I	I	I	I	S	Non-MDR	NO	1	12	0.1
Kumbiya Kumbiya	K040	K040	-	-	+	-	+	+	-	+	R	Y	-	-	Pseudomonas aeruginosa	R	R	R	S	S	R	R	R	R	R	I	S	MDR	YES	8	12	0.7
Kumbiya Kumbiya	K041	K041	-	+	-	+	-	+	+	-	Y	Y	-	+	E. coli	R	S	R	S	S	R	R	R	R	R	I	S	MDR	YES	7	12	0.6
Kumbiya Kumbiya	K042	K042	-	+	-	+	-	+	+	-	Y	Y	-	+	Klebsiella pneumoniae	S	S	S	S	S	S	S	S	S	S	S	S	Non-MDR	NO	0	12	0
Kumbiya Kumbiya	K043	K043	-	+	-	+	-	+	+	-	Y	Y	-	+	E. coli	S	R	S	S	S	S	I	S	S	S	S	S	Non-MDR	NO	1	12	0.1
Kumbiya Kumbiya	K044	K044	-	+	-	+	-	+	+	-	Y	Y	-	+	E. coli	S	S	S	I	S	S	S	S	S	I	S	S	Non-MDR	NO	0	12	0
Kumbiya Kumbiya	K045	K045	-	-	+	-	+	+	-	+	R	Y	-	-	Pseudomonas aeruginosa	R	S	S	S	S	S	S	I	S	S	S	S	Non-MDR	NO	1	12	0.1
Kumbiya Kumbiya	K046	K046	-	+	-	+	-	+	+	-	Y	Y	-	+	Klebsiella pneumoniae	I	S	S	S	S	S	R	R	S	R	S	S	MDR	YES	3	12	0.3
Kumbiya Kumbiya	K047	K047	-	+	-	+	-	+	+	-	Y	Y	-	+	E. coli	R	R	R	S	S	R	R	S	S	S	I	S	MDR	YES	5	12	0.4
Kumbiya Kumbiya	K048	K048	-	-	-	+	-	+	-	-	R	Y	w	-	Salmonella spp	R	R	I	S	S	R	R	I	R	R	R	S	MDR	YES	7	12	0.6
Kumbiya Kumbiya	K049	K049	-	+	-	+	-	+	+	-	Y	Y	-	+	E. coli	R	R	R	S	S	I	I	R	I	R	R	S	MDR	YES	6	12	0.5
Kumbiya Kumbiya	K050	K050	-	+	-	+	-	+	+	-	Y	Y	-	+	E. coli	R	R	R	R	S	I	I	R	S	I	R	S	MDR	YES	6	12	0.5
Kumbiya Kumbiya	K008	K052	-	+	-	+	-	+	+	-	Y	Y	-	+	E. coli	R	R	R	S	I	R	R	R	I	R	R	S	MDR	YES	8	12	0.7
Kumbiya Kumbiya	K012	K053	-	+	-	+	-	+	+	w	Y	Y	-	+	Klebsiella oxytoca	R	R	R	S	S	R	R	R	I	R	R	S	MDR	YES	8	12	0.7
Kumbiya Kumbiya	K018	K054	-	+	-	+	-	+	+	-	Y	Y	-	+	E. coli	R	R	R	S	I	R	R	R	I	R	R	S	MDR	YES	8	12	0.7
Kumbiya Kumbiya	K020	K055	-	+	-	+	-	+	+	-	Y	Y	-	+	Klebsiella pneumoniae	R	R	R	R	S	R	R	I	R	R	I	S	MDR	YES	8	12	0.7
Kumbiya Kumbiya	K021	K056	-	+	+	-	-	+	-	-	Y	Y	-	-	Enterobacter spp	S	S	S	R	R	S	S	I	S	S	S	S	Non-MDR	NO	2	12	0.2
Kumbiya Kumbiya	K024	K057	-	-	+	+	-	+	+	+	R	Y	+	+	Proteus vulgaris	R	R	R	S	S	R	R	I	I	R	R	S	MDR	YES	7	12	0.6
Kumbiya Kumbiya	K025	K058	-	+	+	-	-	+	-	-	Y	Y	-	-	Enterobacter spp	R	R	R	R	S	R	R	R	R	R	R	S	MDR	YES	10	12	0.8
Kumbiya Kumbiya	K029	K059	-	-	+	+	-	+	-	+	R	Y	+	+	Proteus mirabilis	R	R	R	R	S	R	R	S	R	R	R	S	MDR	YES	9	12	0.8
Kumbiya Kumbiya	K031	K060	-	+	-	+	-	+	+	-	Y	Y	-	+	E. coli	R	S	R	S	S	S	R	R	R	R	R	S	MDR	YES	7	12	0.6
Kumbiya Kumbiya	K036	K061	-	+	-	+	-	+	+	-	Y	Y	-	+	Klebsiella pneumoniae	I	R	I	S	S	I	I	I	S	I	I	S	Non-MDR	NO	1	12	0.1
Kumbiya Kumbiya	K038	K062	-	-	-	+	-	+	-	-	R	Y	w	-	Salmonella spp	R	I	R	S	R	I	R	R	I	R	R	S	MDR	YES	7	12	0.6
Kumbiya Kumbiya	K044	K063	-	-	-	+	-	-	-	-	R	Y	-	-	Shigella spp	R	S	R	S	R	I	R	R	R	R	R	S	MDR	YES	8	12	0.7
Kumbiya Kumbiya	K049	K064	-	-	+	+	-	+	+	+	R	Y	+	+	Proteus vulgaris	I	R	I	S	R	R	R	I	R	R	R	S	MDR	YES	7	12	0.6
Jeka da fari	J001	J001	-	+	-	+	-	+	+	-	Y	Y	-	+	E. coli	R	R	R	S	R	R	R	R	R	R	R	I	MDR	YES	10	12	0.8
Jeka da fari	J002	J002	-	-	+	+	-	+	-	+	R	Y	+	+	Proteus mirabilis	R	R	S	S	S	S	R	S	S	S	R	S	MDR	YES	4	12	0.3
Jeka da fari	J003	J003	-	+	+	-	-	+	-	-	Y	Y	-	-	Enterobacter spp	I	I	I	S	S	I	I	I	I	I	I	S	Non-MDR	NO	0	12	0
Jeka da fari	J004	J004	-	-	+	-	+	+	-	+	R	Y	-	-	Pseudomonas aeruginosa	S	S	S	I	S	S	S	S	S	S	S	S	Non-MDR	NO	0	12	0
Jeka da fari	J005	J005	-	+	-	+	-	+	+	-	Y	Y	-	+	E. coli	S	R	I	S	S	S	S	I	S	R	R	S	Non-MDR	NO	3	12	0.3
Jeka da fari	J006	J006	-	+	-	+	-	+	+	-	Y	Y	-	+	Klebsiella pneumoniae	S	S	S	S	S	S	S	S	S	S	S	S	Non-MDR	NO	0	12	0
Jeka da fari	J007	J007	-	-	-	+	-	+	-	-	R	Y	w	-	Salmonella spp	I	I	I	S	S	I	S	R	I	I	I	S	Non-MDR	NO	1	12	0.1
Jeka da fari	J008	J008	-	+	-	+	-	+	+	-	Y	Y	-	+	E. coli	R	R	R	S	S	R	S	R	R	I	R	S	MDR	YES	7	12	0.6
Jeka da fari	J009	J009	-	+	-	+	-	+	+	-	Y	Y	-	+	E. coli	S	R	I	S	S	S	S	I	S	R	R	S	MDR	YES	3	12	0.3
Jeka da fari	J010	J010	-	-	-	+	-	+	-	-	R	Y	w	-	Salmonella spp	R	R	R	S	S	R	R	R	S	R	S	S	MDR	YES	7	12	0.6
Jeka da fari	J011	J011	-	+	-	+	-	+	+	-	Y	Y	-	+	E. coli	R	R	R	S	R	R	R	R	R	R	R	S	MDR	YES	10	12	0.8
Jeka da fari	J012	J012	-	+	-	+	-	+	+	w	Y	Y	-	+	Klebsiella oxytoca	R	R	R	S	S	R	R	R	R	R	R	S	MDR	YES	9	12	0.8
Jeka da fari	J013	J013	-	+	-	+	-	+	+	-	Y	Y	-	+	Klebsiella pneumoniae	R	I	I	R	S	I	R	R	I	R	R	S	MDR	YES	6	12	0.5
Jeka da fari	J014	J014	-	+	-	+	-	+	+	-	Y	Y	-	+	E. coli	R	R	R	S	S	R	R	R	I	R	R	S	MDR	YES	8	12	0.7
Jeka da fari	J015	J015	-	+	-	+	-	+	+	-	Y	Y	-	+	E. coli	R	R	R	R	S	R	R	R	R	R	R	S	MDR	YES	10	12	0.8
Jeka da fari	J016	J016	-	-	+	-	+	+	-	+	R	Y	-	-	Pseudomonas aeruginosa	R	I	R	S	S	R	R	I	S	R	R	S	MDR	YES	6	12	0.5
Jeka da fari	J017	J017	-	+	-	+	-	+	+	-	Y	Y	-	+	Klebsiella pneumoniae	S	S	S	S	S	S	S	S	S	S	S	S	Non-MDR	NO	0	12	0
Jeka da fari	J018	J018	-	+	-	+	-	+	+	-	Y	Y	-	+	E. coli	R	S	S	S	S	R	S	S	S	S	R	S	MDR	YES	3	12	0.3
Jeka da fari	J019	J019	-	-	+	+	-	+	-	+	R	Y	+	+	Proteus mirabilis	R	R	R	R	S	I	S	R	R	R	R	S	MDR	YES	8	12	0.7
Jeka da fari	J020	J020	-	+	-	+	-	+	+	-	Y	Y	-	+	E. coli	R	I	S	S	S	S	S	R	S	R	R	S	MDR	YES	4	12	0.3
Jeka da fari	J021	J021	-	+	-	+	-	+	+	-	Y	Y	-	+	Klebsiella pneumoniae	I	I	I	I	S	I	I	I	I	R	I	S	Non-MDR	NO	1	12	0.1
Jeka da fari	J022	J022	-	+	-	+	-	+	+	-	Y	Y	-	+	Klebsiella pneumoniae	R	R	I	S	S	R	R	R	I	R	R	S	MDR	YES	7	12	0.6
Jeka da fari	J023	J023	-	+	-	+	-	+	+	-	Y	Y	-	+	E. coli	R	I	R	S	S	R	S	S	R	R	R	S	MDR	YES	6	12	0.5
Jeka da fari	J024	J024	-	+	-	+	-	+	+	-	Y	Y	-	+	E. coli	R	R	R	R	S	R	R	R	R	R	I	S	MDR	YES	9	12	0.8
Jeka da fari	J025	J025	-	+	-	+	-	+	+	-	Y	Y	-	+	Klebsiella pneumoniae	I	S	S	S	S	I	I	S	S	S	S	S	Non-MDR	NO	0	12	0
Jeka da fari	J026	J026	-	+	-	+	-	+	+	w	Y	Y	-	+	Klebsiella oxytoca	R	R	S	S	R	R	R	S	R	R	R	S	MDR	YES	8	12	0.7
Jeka da fari	J027	J027	-	-	+	-	+	+	-	+	R	Y	-	-	Pseudomonas aeruginosa	R	I	I	S	S	R	R	R	R	I	R	S	MDR	YES	6	12	0.5
Jeka da fari	J028	J028	-	+	-	+	-	+	+	-	Y	Y	-	+	E. coli	S	S	S	S	S	S	S	S	S	S	S	S	Non-MDR	NO	0	12	0
Jeka da fari	J029	J029	-	+	-	+	-	+	+	-	Y	Y	-	+	E. coli	I	R	I	S	S	S	I	R	R	R	S	S	MDR	YES	4	12	0.3
Jeka da fari	J030	J030	-	+	-	+	-	+	+	-	Y	Y	-	+	Klebsiella pneumoniae	R	R	R	S	R	R	R	R	S	R	R	S	MDR	YES	9	12	0.8
Jeka da fari	J031	J031	-	+	+	-	-	-	-	-	Y	Y	-	+	Klebsiella pneumoniae	I	R	R	S	S	I	S	R	R	R	R	S	MDR	YES	6	12	0.5
Jeka da fari	J032	J032	-	+	-	+	-	+	+	-	Y	Y	-	+	E. coli	I	I	I	S	R	S	I	S	I	I	I	S	Non-MDR	NO	1	12	0.1
Jeka da fari	J033	J033	-	+	-	+	-	+	+	-	Y	Y	-	+	E. coli	R	I	R	S	S	R	R	I	I	R	R	S	MDR	YES	6	12	0.5
Jeka da fari	J034	J034	-	+	-	+	-	+	+	w	Y	Y	-	+	Klebsiella oxytoca	R	I	I	S	S	S	R	I	I	I	S	R	MDR	YES	3	12	0.3
Jeka da fari	J035	J035	-	+	-	+	-	+	+	-	Y	Y	-	+	E. coli	R	I	S	S	S	I	I	I	S	I	S	S	Non-MDR	NO	1	12	0.1
Jeka da fari	J036	J036	-	-	+	-	+	+	-	+	R	Y	-	-	Pseudomonas aeruginosa	I	R	R	S	S	I	I	I	S	I	I	S	Non-MDR	NO	2	12	0.2
Jeka da fari	J037	J037	-	+	-	+	-	+	+	-	Y	Y	-	+	Klebsiella pneumoniae	I	S	I	S	S	S	S	S	S	I	S	S	Non-MDR	NO	0	12	0
Jeka da fari	J038	J038	-	+	-	+	-	+	+	-	Y	Y	-	+	Klebsiella pneumoniae	S	S	S	S	S	I	I	S	S	S	S	S	Non-MDR	NO	0	12	0
Jeka da fari	J039	J039	-	-	+	+	-	+	-	+	R	Y	+	+	Proteus mirabilis	I	R	I	S	S	S	S	S	R	S	R	S	MDR	YES	3	12	0.3
Jeka da fari	J040	J040	-	-	+	-	+	+	-	+	R	Y	-	-	Pseudomonas aeruginosa	I	I	R	R	R	R	R	R	R	R	R	I	MDR	YES	9	12	0.8
Jeka da fari	J041	J041	-	+	-	+	-	+	+	-	Y	Y	-	+	Klebsiella pneumoniae	I	I	S	S	S	I	S	S	S	S	R	S	Non-MDR	NO	1	12	0.1
Jeka da fari	J042	J042	-	+	-	+	-	+	+	-	Y	Y	-	+	E. coli	R	R	R	S	S	S	S	S	S	S	R	S	MDR	YES	4	12	0.3
Jeka da fari	J043	J043	-	+	-	+	-	+	+	-	Y	Y	-	+	E. coli	R	S	S	S	S	S	S	R	S	S	R	S	MDR	YES	3	12	0.3
Jeka da fari	J044	J044	-	-	-	+	-	+	-	-	R	Y	w	-	Salmonella spp	R	S	S	S	S	I	R	R	R	S	R	S	MDR	YES	5	12	0.4
Jeka da fari	J005	J045	-	-	+	+	-	+	-	+	R	Y	+	+	Proteus mirabilis	R	R	R	S	I	R	R	I	R	S	R	S	MDR	YES	7	12	0.6
Jeka da fari	J008	J046	-	+	+	-	-	+	-	-	Y	Y	-	-	Enterobacter spp	R	R	R	S	S	R	R	I	R	I	R	S	MDR	YES	7	12	0.6
Jeka da fari	J017	J047	-	+	-	+	-	+	+	-	Y	Y	-	+	E. coli	R	S	R	S	S	R	R	R	R	R	I	S	MDR	YES	7	12	0.6
Jeka da fari	J022	J048	-	-	+	+	-	+	-	+	R	Y	+	+	Proteus mirabilis	R	R	S	S	S	S	R	S	S	S	R	S	MDR	YES	4	12	0.3
Jeka da fari	J028	J049	-	-	+	-	+	+	-	+	R	Y	-	-	Pseudomonas aeruginosa	R	R	R	R	R	R	R	R	R	R	R	S	MDR	YES	11	12	0.9
Jeka da fari	J034	J050	-	+	+	-	-	+	-	-	Y	Y	-	-	Enterobacter spp	R	R	R	S	S	R	R	S	R	I	R	S	MDR	YES	7	12	0.6
Jeka da fari	J026	J051	-	-	-	+	-	+	-	-	R	Y	w	-	Salmonella spp	S	R	I	S	I	R	I	S	S	R	I	S	MDR	YES	3	12	0.3
Jeka da fari	J042	J052	-	-	+	+	-	+	-	+	R	Y	+	+	Proteus mirabilis	R	R	R	S	S	I	S	R	R	I	R	S	MDR	YES	6	12	0.5
Pantami	P001	P001	-	-	-	+	-	-	-	-	R	Y	-	-	Shigella spp	S	S	S	I	I	S	I	S	S	S	R	S	Non-MDR	NO	1	12	0.1
Pantami	P002	P002	-	-	+	+	-	+	+	+	R	Y	+	+	Proteus vulgaris	S	S	S	S	S	S	S	S	S	S	S	S	Non-MDR	NO	0	12	0
Pantami	P003	P003	-	+	-	+	-	+	+	-	Y	Y	-	+	Klebsiella pneumoniae	I	S	S	R	S	S	R	S	R	S	S	S	MDR	YES	2	12	0.2
Pantami	P004	P004	-	+	-	+	-	+	+	-	Y	Y	-	+	E. coli	S	S	S	S	S	S	S	S	S	S	S	S	Non-MDR	NO	0	12	0
Pantami	P005	P005	-	-	-	+	-	+	-	-	R	Y	w	-	Salmonella spp	S	S	S	S	S	I	S	I	S	S	S	S	Non-MDR	NO	0	12	0
Pantami	P006	P006	-	+	+	-	-	+	-	-	Y	Y	-	-	Enterobacter spp	S	R	S	S	S	R	S	R	S	S	S	S	MDR	YES	3	12	0.3
Pantami	P007	P007	-	-	+	+	-	+	-	+	R	Y	+	+	Proteus mirabilis	I	I	R	S	S	S	S	R	I	R	R	S	MDR	YES	4	12	0.3
Pantami	P008	P008	-	-	-	+	-	+	-	-	R	Y	w	-	Salmonella spp	S	S	S	S	S	R	R	R	R	S	R	S	MDR	YES	5	12	0.4
Pantami	P009	P009	-	+	-	+	-	+	+	-	Y	Y	-	+	Klebsiella pneumoniae	R	I	S	S	S	R	R	R	R	S	R	S	MDR	YES	6	12	0.5
Pantami	P010	P010	-	+	-	+	-	+	+	w	Y	Y	-	+	Klebsiella oxytoca	R	R	R	S	S	S	R	I	I	R	I	S	MDR	YES	4	12	0.3
Pantami	P011	P011	-	+	-	+	-	+	+	-	Y	Y	-	+	E. coli	R	I	I	S	S	I	S	I	S	I	I	S	Non-MDR	NO	1	12	0.1
Pantami	P012	P012	-	+	+	-	-	+	-	-	Y	Y	-	-	Enterobacter spp	S	S	R	S	S	S	S	S	S	S	S	S	Non-MDR	NO	1	12	0.1
Pantami	P013	P013	-	+	-	+	-	+	+	-	Y	Y	-	+	E. coli	R	R	R	S	S	I	S	R	R	I	R	S	MDR	YES	6	12	0.5
Pantami	P014	P014	-	-	+	-	+	+	-	+	R	Y	-	-	Pseudomonas aeruginosa	R	I	R	S	S	I	R	I	S	S	S	S	MDR	YES	2	12	0.2
Pantami	P015	P015	-	+	-	+	-	+	+	-	Y	Y	-	+	E. coli	R	S	S	S	S	R	S	S	S	S	S	S	MDR	YES	2	12	0.2
Pantami	P016	P016	-	+	-	+	-	+	+	-	Y	Y	-	+	Klebsiella pneumoniae	I	I	S	S	S	R	S	S	R	R	R	S	MDR	YES	4	12	0.3
Pantami	P017	P017	-	+	-	+	-	+	+	-	Y	Y	-	+	E. coli	R	R	R	S	S	S	R	S	S	R	I	S	MDR	YES	5	12	0.4
Pantami	P018	P018	-	+	-	+	-	+	+	-	Y	Y	-	+	E. coli	R	R	R	S	R	R	R	R	R	R	R	R	MDR	YES	11	12	0.9
Pantami	P019	P019	-	-	-	+	-	-	-	-	R	Y	-	-	Shigella spp	R	S	S	S	S	I	I	R	S	R	R	S	MDR	YES	4	12	0.3
Pantami	P020	P020	-	+	-	+	-	+	+	w	Y	Y	-	+	Klebsiella oxytoca	R	I	I	I	S	R	I	R	R	R	R	S	MDR	YES	6	12	0.5
Pantami	P021	P021	-	+	-	+	-	+	+	-	Y	Y	-	+	E. coli	R	R	R	S	S	S	S	R	R	I	R	S	MDR	YES	6	12	0.5
Pantami	P022	P022	-	+	+	-	-	+	-	-	Y	Y	-	-	Enterobacter spp	R	R	R	S	S	S	R	R	R	R	R	S	MDR	YES	8	12	0.7
Pantami	P023	P023	-	-	-	+	-	-	-	-	R	Y	-	-	Shigella spp	S	S	S	S	S	S	S	S	S	S	S	S	Non-MDR	NO	0	12	0
Pantami	P024	P024	-	+	-	+	-	+	+	-	Y	Y	-	+	Klebsiella pneumoniae	R	S	S	S	S	R	S	S	S	R	S	S	MDR	YES	3	12	0.3
Pantami	P025	P025	-	+	-	+	-	+	+	-	Y	Y	-	+	E. coli	R	R	I	S	S	S	S	R	R	R	R	S	MDR	YES	6	12	0.5
Pantami	P026	P026	-	-	+	+	-	+	+	+	R	Y	+	+	Proteus vulgaris	R	R	R	S	S	S	R	R	R	R	R	S	MDR	YES	8	12	0.7
Pantami	P027	P027	-	+	-	+	-	+	+	-	Y	Y	-	+	E. coli	R	R	R	R	R	R	R	R	R	R	R	R	MDR	YES	12	12	1
Pantami	P028	P028	-	+	-	+	-	+	+	-	Y	Y	-	+	E. coli	R	R	R	S	S	S	R	R	R	R	R	S	MDR	YES	8	12	0.7
Pantami	P029	P029	-	+	-	+	-	+	+	-	Y	Y	-	+	Klebsiella pneumoniae	I	S	I	S	S	S	S	S	S	S	S	S	Non-MDR	NO	0	12	0
Pantami	P030	P030	-	+	-	+	-	+	+	-	Y	Y	-	+	E. coli	I	S	R	S	S	R	S	R	S	S	S	S	MDR	YES	10	12	0.8
Pantami	P031	P031	-	+	-	+	-	+	+	-	Y	Y	-	+	E. coli	S	S	R	S	S	S	R	S	R	S	S	S	MDR	YES	3	12	0.3
Pantami	P032	P032	-	+	-	+	-	+	+	-	Y	Y	-	+	Klebsiella pneumoniae	R	R	R	S	S	S	R	R	I	R	R	S	MDR	YES	7	12	0.6
Pantami	P033	P033	-	+	-	+	-	+	+	-	Y	Y	-	+	E. coli	R	R	R	S	S	R	R	R	R	R	R	S	MDR	YES	9	12	0.8
Pantami	P034	P034	-	+	-	+	-	+	+	-	Y	Y	-	+	E. coli	R	R	R	R	R	R	R	R	R	R	R	R	MDR	YES	12	12	1
Pantami	P035	P035	-	+	-	+	-	+	+	-	Y	Y	-	+	Klebsiella pneumoniae	I	R	I	I	S	R	S	R	R	R	R	S	MDR	YES	6	12	0.5
Pantami	P036	P036	-	+	-	+	-	+	+	-	Y	Y	-	+	Klebsiella pneumoniae	S	I	S	S	S	I	S	I	S	S	S	S	Non-MDR	NO	0	12	0
Pantami	P037	P037	-	+	+	-	-	+	-	-	Y	Y	-	-	Enterobacter spp	R	I	S	S	S	S	R	R	S	R	I	S	MDR	YES	4	12	0.3
Pantami	P038	P038	-	+	-	+	-	+	+	-	Y	Y	-	+	E. coli	S	I	R	S	S	S	R	S	S	R	S	S	MDR	YES	2	12	0.2
Pantami	P039	P039	-	+	-	-	-	+	-	+	Y	Y	-	+	Serratia marcescens	R	I	S	S	S	S	R	R	S	S	I	S	MDR	YES	3	12	0.3
Pantami	P040	P040	-	+	-	+	-	+	+	-	Y	Y	-	+	Klebsiella pneumoniae	I	R	R	S	S	R	R	S	S	S	R	S	MDR	YES	5	12	0.4
Pantami	P041	P041	-	+	-	+	-	+	+	-	Y	Y	-	+	E. coli	R	I	I	S	S	S	S	I	R	I	R	S	MDR	YES	3	12	0.3
Pantami	P042	P042	-	+	-	+	-	+	+	-	Y	Y	-	+	Klebsiella pneumoniae	R	R	R	S	S	S	S	S	R	S	R	S	MDR	YES	5	12	0.4
Pantami	P043	P043	-	+	-	+	-	+	+	-	Y	Y	-	+	Klebsiella pneumoniae	R	S	R	R	R	S	R	R	S	S	S	S	MDR	YES	6	12	0.5
Pantami	P044	P044	-	+	-	+	-	+	+	-	Y	Y	-	+	E. coli	I	R	R	S	S	R	R	S	S	S	R	S	MDR	YES	5	12	0.4
Pantami	P045	P045	-	+	-	+	-	+	+	-	Y	Y	-	+	Klebsiella pneumoniae	S	S	S	S	S	S	S	R	R	R	S	S	MDR	YES	3	12	0.3
Pantami	P046	P046	-	+	-	+	-	+	+	-	Y	Y	-	+	E. coli	R	I	R	S	S	S	R	R	R	I	R	S	MDR	YES	6	12	0.5
Pantami	P047	P047	-	+	-	+	-	+	+	-	Y	Y	-	+	E. coli	R	R	R	S	S	I	R	R	R	R	R	S	MDR	YES	8	12	0.7
Pantami	P048	P048	-	+	-	+	-	+	+	-	Y	Y	-	+	E. coli	R	R	I	S	S	R	R	R	I	R	R	S	MDR	YES	7	12	0.6
Pantami	P049	P049	-	+	-	+	-	+	+	w	Y	Y	-	+	Klebsiella oxytoca	R	I	S	S	S	R	R	R	R	I	I	S	MDR	YES	5	12	0.4
Pantami	P050	P050	-	+	-	+	-	+	+	-	Y	Y	-	+	E. coli	I	R	S	S	S	R	R	S	S	S	S	S	MDR	YES	3	12	0.3
Pantami	P051	P051	-	+	-	+	-	+	+	-	Y	Y	-	+	Klebsiella pneumoniae	R	R	R	S	S	S	S	R	R	S	S	S	MDR	YES	5	12	0.4
Pantami	P052	P052	-	+	-	+	-	+	+	-	Y	Y	-	+	E. coli	R	R	R	S	S	R	R	R	S	R	I	S	MDR	YES	7	12	0.6
Pantami	P004	P053	-	-	-	+	-	+	-	-	R	Y	w	-	Salmonella spp	R	R	R	S	R	R	R	R	R	R	R	S	MDR	YES	10	12	0.8
Pantami	P009	P054	-	-	+	+	-	+	-	+	R	Y	+	+	Proteus mirabilis	R	R	R	I	R	R	R	R	R	R	R	R	MDR	YES	11	12	0.9
Pantami	P011	P055	-	-	+	-	+	+	-	+	R	Y	-	-	Pseudomonas aeruginosa	R	R	R	S	R	R	R	S	R	R	R	S	MDR	YES	9	12	0.8
Pantami	P013	P056	-	+	+	-	-	+	-	-	Y	Y	-	-	Enterobacter spp	S	I	R	S	S	R	S	S	R	S	S	S	MDR	YES	3	12	0.3
Pantami	P015	P057	-	+	-	-	-	+	-	+	Y	Y	-	+	Serratia marcescens	R	R	S	S	S	S	S	R	R	R	R	S	MDR	YES	6	12	0.5
Pantami	P017	P058	-	-	-	+	-	-	-	-	R	Y	-	-	Shigella spp	R	S	R	S	R	I	R	R	R	R	R	S	MDR	YES	8	12	0.7
Pantami	P018	P059	-	-	-	+	-	+	-	-	R	Y	w	-	Salmonella spp	R	I	R	S	R	I	R	R	I	R	R	S	MDR	YES	7	12	0.6
Pantami	P020	P060	-	-	+	-	+	+	-	+	R	Y	-	-	Pseudomonas aeruginosa	R	R	R	R	I	R	R	R	R	R	R	R	MDR	YES	11	12	0.9
Pantami	P025	P061	-	-	+	+	-	+	-	+	R	Y	+	+	Proteus mirabilis	R	I	R	R	S	R	R	R	R	R	R	S	MDR	YES	9	12	0.8
Pantami	P027	P062	-	+	-	+	-	+	+	w	Y	Y	-	+	Klebsiella oxytoca	R	R	R	S	S	R	R	R	I	R	R	S	MDR	YES	8	12	0.7
Pantami	P028	P063	-	-	-	+	-	+	-	-	R	Y	w	-	Salmonella spp	S	I	R	R	S	R	R	R	S	S	S	S	MDR	YES	5	12	0.4
Pantami	P029	P064	-	+	+	-	-	+	-	-	Y	Y	-	-	Enterobacter spp	S	S	S	R	R	S	S	I	S	S	S	S	MDR	YES	2	12	0.2
Pantami	P033	P065	-	-	+	+	-	+	-	+	R	Y	+	+	Proteus mirabilis	R	R	R	R	S	R	R	S	R	R	R	S	MDR	YES	9	12	0.8
Pantami	P034	P066	-	-	-	+	-	+	-	-	R	Y	w	-	Salmonella spp	R	R	R	I	R	R	R	R	R	R	R	R	MDR	YES	11	12	0.9
Pantami	P036	P067	-	-	+	+	-	+	+	+	R	Y	+	+	Proteus vulgaris	R	I	R	R	I	R	R	R	R	R	R	S	MDR	YES	9	12	0.8
Pantami	P038	P068	-	-	-	+	-	+	-	-	R	Y	w	-	Salmonella spp	R	R	R	S	S	R	R	R	R	S	R	S	MDR	YES	8	12	0.7
Pantami	P041	P069	-	+	-	+	-	+	+	w	Y	Y	-	+	Klebsiella oxytoca	R	R	R	R	I	R	R	I	R	R	R	S	MDR	YES	9	12	0.8
Pantami	P044	P070	-	-	+	-	+	+	-	+	R	Y	-	-	Pseudomonas aeruginosa	R	R	R	S	S	R	R	R	R	R	R	S	MDR	YES	9	12	0.8
Pantami	P046	P071	-	-	-	+	-	+	-	-	R	Y	w	-	Salmonella spp	S	S	S	R	S	R	S	S	R	S	S	R	MDR	YES	3	12	0.3
Pantami	P047	P072	-	-	-	+	-	+	-	-	R	Y	w	-	Salmonella spp	R	R	R	S	S	R	R	R	R	R	R	S	MDR	YES	9	12	0.8
Pantami	P048	P073	-	+	-	+	-	+	+	-	Y	Y	-	+	Klebsiella pneumoniae	R	R	R	R	R	I	I	R	I	I	R	S	MDR	YES	7	12	0.6
Pantami	P050	P074	-	-	+	+	-	+	+	+	R	Y	+	+	Proteus vulgaris	I	R	I	S	R	R	R	I	R	R	R	S	MDR	YES	7	12	0.6
Pantami	P052	P075	-	-	-	+	-	-	-	-	R	Y	-	-	Shigella spp	R	R	I	R	R	R	R	R	R	R	R	I	MDR	YES	10	12	0.8
Pantami	P020	P076	-	+	-	+	-	+	+	-	Y	Y	-	+	E. coli	R	I	R	R	R	R	R	S	R	I	S	S	MDR	YES	7	12	0.6
Pantami	P036	P077	-	+	-	+	-	+	+	-	Y	Y	-	+	E. coli	R	R	R	S	I	R	R	R	I	R	R	S	MDR	YES	8	12	0.7
Pantami	P038	P078	-	+	-	+	-	+	+	w	Y	Y	-	+	Klebsiella oxytoca	R	R	S	S	S	I	I	R	R	R	R	S	MDR	YES	6	12	0.5
Pantami	P044	P079	-	-	-	+	-	+	-	-	R	Y	w	-	Salmonella spp	S	S	S	S	S	R	I	S	S	S	S	S	Non-MDR	NO	1	12	0.1
Pantami	P046	P080	-	+	-	+	-	+	+	-	Y	Y	-	+	Klebsiella pneumoniae	R	R	R	S	I	R	R	R	R	R	R	R	MDR	YES	10	12	0.8
Pantami	P050	P081	-	+	-	-	-	+	-	+	Y	Y	-	+	Serratia marcescens	R	R	S	S	S	S	S	R	S	R	I	S	MDR	YES	4	12	0.3
Nasarawo	N001	N001	-	+	-	+	-	+	+	-	Y	Y	-	+	E. coli	R	R	R	S	S	S	R	R	R	R	R	S	MDR	YES	8	12	0.7
Nasarawo	N002	N002	-	+	-	+	-	+	+	-	Y	Y	-	+	E. coli	R	R	S	S	S	S	R	R	I	R	S	S	MDR	YES	5	12	0.4
Nasarawo	N003	N003	-	+	-	+	-	+	+	w	Y	Y	-	+	Klebsiella oxytoca	R	R	R	S	S	S	R	R	I	R	R	S	MDR	YES	7	12	0.6
Nasarawo	N004	N004	-	+	-	+	-	+	+	-	Y	Y	-	+	E. coli	S	R	R	R	S	R	R	R	I	R	R	S	MDR	YES	8	12	0.7
Nasarawo	N005	N005	-	+	-	+	-	+	+	-	Y	Y	-	+	Klebsiella pneumoniae	R	R	R	S	S	S	R	R	R	R	R	S	MDR	YES	8	12	0.7
Nasarawo	N006	N006	-	+	-	+	-	+	+	-	Y	Y	-	+	E. coli	R	R	R	S	S	R	R	R	R	R	R	S	MDR	YES	9	12	0.8
Nasarawo	N007	N007	-	-	-	+	-	+	-	-	R	Y	w	-	Salmonella spp	R	R	R	S	S	R	R	R	R	R	R	S	MDR	YES	9	12	0.8
Nasarawo	N008	N008	-	+	-	+	-	+	+	-	Y	Y	-	+	Klebsiella pneumoniae	R	R	R	S	S	R	S	R	R	R	R	S	MDR	YES	8	12	0.7
Nasarawo	N009	N009	-	-	+	-	+	+	-	+	R	Y	-	-	Pseudomonas aeruginosa	R	R	R	S	S	R	R	R	R	R	R	S	MDR	YES	9	12	0.8
Nasarawo	N010	N010	-	+	-	+	-	+	+	-	Y	Y	-	+	E. coli	R	R	R	S	S	S	R	R	R	R	R	S	MDR	YES	8	12	0.7
Nasarawo	N011	N011	-	-	-	+	-	+	-	-	R	Y	w	-	Salmonella spp	R	R	R	S	S	R	R	R	R	R	R	S	MDR	YES	9	12	0.8
Nasarawo	N012	N012	-	+	-	+	-	+	+	-	Y	Y	-	+	Klebsiella pneumoniae	R	R	R	S	S	S	R	R	S	R	I	S	MDR	YES	6	12	0.5
Nasarawo	N013	N013	-	+	-	+	-	+	+	-	Y	Y	-	+	Klebsiella pneumoniae	R	R	R	S	S	S	R	R	S	R	R	S	MDR	YES	7	12	0.6
Nasarawo	N014	N014	-	-	+	+	-	+	+	+	R	Y	+	+	Proteus vulgaris	I	I	R	S	S	R	R	R	R	I	R	S	MDR	YES	6	12	0.5
Nasarawo	N015	N015	-	+	-	+	-	+	+	-	Y	Y	-	+	E. coli	S	R	R	I	I	R	R	R	R	R	R	S	MDR	YES	8	12	0.7
Nasarawo	N016	N016	-	+	-	+	-	+	+	-	Y	Y	-	+	E. coli	I	I	S	S	S	S	S	R	S	R	S	S	MDR	YES	2	12	0.2
Nasarawo	N017	N017	-	-	-	+	-	+	-	-	R	Y	w	-	Salmonella spp	R	R	R	S	S	S	R	R	R	R	R	S	MDR	YES	8	12	0.7
Nasarawo	N018	N018	-	+	+	-	-	+	-	-	Y	Y	-	-	Enterobacter spp	R	R	R	S	S	R	I	R	R	R	R	S	MDR	YES	8	12	0.7
Nasarawo	N019	N019	-	+	-	+	-	+	+	-	Y	Y	-	+	E. coli	R	R	R	I	I	R	R	R	R	R	R	I	MDR	YES	9	12	0.8
Nasarawo	N020	N020	-	-	+	-	+	+	-	+	R	Y	-	-	Pseudomonas aeruginosa	R	R	R	S	S	R	R	R	R	R	R	S	MDR	YES	9	12	0.8
Nasarawo	N021	N021	-	+	-	+	-	+	+	-	Y	Y	-	+	E. coli	R	R	R	R	I	R	R	R	R	R	R	I	MDR	YES	10	12	0.8
Nasarawo	N022	N022	-	+	-	+	-	+	+	-	Y	Y	-	+	Klebsiella pneumoniae	R	R	R	I	S	S	R	R	R	R	R	I	MDR	YES	8	12	0.7
Nasarawo	N023	N023	-	+	-	+	-	+	+	-	Y	Y	-	+	Klebsiella pneumoniae	R	R	R	S	S	I	R	R	R	R	R	S	MDR	YES	8	12	0.7
Nasarawo	N024	N024	-	+	-	+	-	+	+	-	Y	Y	-	+	E. coli	R	R	R	S	S	S	R	R	R	R	R	S	MDR	YES	8	12	0.7
Nasarawo	N025	N025	-	+	-	+	-	+	+	-	Y	Y	-	+	E. coli	R	R	R	S	S	R	R	R	R	R	R	S	MDR	YES	9	12	0.8
Nasarawo	N026	N026	-	-	+	-	+	+	-	+	R	Y	-	-	Pseudomonas aeruginosa	R	R	R	S	S	S	R	R	I	R	R	S	MDR	YES	7	12	0.6
Nasarawo	N027	N027	-	+	-	+	-	+	+	w	Y	Y	-	+	Klebsiella oxytoca	R	S	R	S	S	R	R	R	R	S	R	S	MDR	YES	7	12	0.6
Nasarawo	N028	N028	-	+	-	+	-	+	+	-	Y	Y	-	+	E. coli	R	R	R	S	S	R	R	R	R	R	R	S	MDR	YES	9	12	0.8
Nasarawo	N029	N029	-	+	-	+	-	+	+	-	Y	Y	-	+	Klebsiella pneumoniae	R	R	R	S	S	S	R	R	I	R	R	S	MDR	YES	7	12	0.6
Nasarawo	N030	N030	-	+	-	+	-	+	+	-	Y	Y	-	+	Klebsiella pneumoniae	R	S	R	I	I	R	R	R	R	S	R	I	MDR	YES	7	12	0.6
Nasarawo	N031	N031	-	-	+	+	-	+	-	+	R	Y	+	+	Proteus mirabilis	R	R	R	I	I	I	R	R	R	R	R	S	MDR	YES	8	12	0.7
Nasarawo	N032	N032	-	+	-	+	-	+	+	-	Y	Y	-	+	E. coli	R	R	R	S	S	R	R	R	I	R	R	S	MDR	YES	8	12	0.7
Nasarawo	N033	N033	-	+	-	+	-	+	+	-	Y	Y	-	+	Klebsiella pneumoniae	R	S	S	I	S	S	S	S	S	I	S	S	Non-MDR	NO	1	12	0.1
Nasarawo	N034	N034	-	+	-	+	-	+	+	-	Y	Y	-	+	E. coli	R	R	R	S	S	R	R	R	S	R	R	S	MDR	YES	8	12	0.7
Nasarawo	N035	N035	-	+	-	+	-	+	+	-	Y	Y	-	+	Klebsiella pneumoniae	R	R	R	S	I	S	I	I	R	R	R	S	MDR	YES	6	12	0.5
Nasarawo	N036	N036	-	+	-	+	-	+	+	-	Y	Y	-	+	E. coli	R	R	R	S	S	S	R	R	S	R	R	S	MDR	YES	7	12	0.6
Nasarawo	N037	N037	-	+	-	+	-	+	+	-	Y	Y	-	+	E. coli	R	R	R	S	S	I	R	R	R	R	R	S	MDR	YES	8	12	0.7
Nasarawo	N038	N038	-	-	-	+	-	+	-	-	R	Y	w	-	Salmonella spp	R	R	I	S	S	S	R	R	R	R	S	S	MDR	YES	6	12	0.5
Nasarawo	N039	N039	-	-	+	-	+	+	-	+	R	Y	-	-	Pseudomonas aeruginosa	R	R	R	S	S	S	R	R	R	R	R	S	MDR	YES	8	12	0.7
Nasarawo	N040	N040	-	+	-	+	-	+	+	-	Y	Y	-	+	Klebsiella pneumoniae	S	S	S	S	S	S	S	S	S	S	S	S	Non-MDR	NO	0	12	0
Nasarawo	N041	N041	-	+	-	+	-	+	+	-	Y	Y	-	+	E. coli	R	R	R	S	S	I	S	R	R	R	R	S	MDR	YES	7	12	0.6
Nasarawo	N042	N042	-	+	-	+	-	+	+	-	Y	Y	-	+	Klebsiella pneumoniae	R	R	R	S	S	S	R	R	R	R	R	S	MDR	YES	8	12	0.7
Nasarawo	N043	N043	-	+	-	+	-	+	+	-	Y	Y	-	+	E. coli	R	R	R	S	S	S	R	R	R	R	R	S	MDR	YES	8	12	0.7
Nasarawo	N044	N044	-	-	+	-	+	+	-	+	R	Y	-	-	Pseudomonas aeruginosa	R	R	R	S	S	R	R	R	R	R	R	S	MDR	YES	9	12	0.8
Nasarawo	N045	N045	-	+	-	+	-	+	+	-	Y	Y	-	+	Klebsiella pneumoniae	R	R	R	S	S	R	R	R	R	R	R	S	MDR	YES	9	12	0.8
Nasarawo	N002	N046	-	-	-	+	-	-	-	-	R	Y	-	-	Shigella spp	R	S	R	S	R	I	R	R	R	R	R	S	MDR	YES	8	12	0.7
Nasarawo	N007	N047	-	+	-	+	-	+	+	-	Y	Y	-	+	Klebsiella pneumoniae	I	S	S	S	S	S	R	R	S	R	S	S	MDR	YES	3	12	0.3
Nasarawo	N008	N048	-	+	-	+	-	+	+	-	Y	Y	-	+	E. coli	R	S	R	S	S	S	R	R	R	R	R	S	MDR	YES	7	12	0.6
Nasarawo	N009	N049	-	+	-	+	-	+	+	-	Y	Y	-	+	E. coli	R	I	S	S	S	S	S	R	S	R	R	S	MDR	YES	4	12	0.3
Nasarawo	N016	N050	-	-	+	+	-	+	+	+	R	Y	+	+	Proteus vulgaris	R	R	S	R	S	S	S	R	R	I	S	S	MDR	YES	5	12	0.4
Nasarawo	N029	N051	-	-	+	-	+	+	-	+	R	Y	-	-	Pseudomonas aeruginosa	R	I	R	S	S	R	R	I	S	R	R	S	MDR	YES	6	12	0.5
Nasarawo	N034	N052	-	-	+	+	-	+	+	+	R	Y	+	+	Proteus vulgaris	R	I	S	R	S	S	R	R	R	I	S	S	MDR	YES	5	12	0.4
Nasarawo	N039	N053	-	+	-	+	-	+	+	w	Y	Y	-	+	Klebsiella oxytoca	R	S	R	S	S	S	R	R	R	R	R	S	MDR	YES	7	12	0.6
Nasarawo	N041	N054	-	-	+	+	-	+	-	+	R	Y	+	+	Proteus mirabilis	R	R	S	S	S	S	R	S	S	S	R	S	MDR	YES	4	12	0.3
Nasarawo	N042	N055	-	+	-	+	-	+	+	-	Y	Y	-	+	E. coli	R	I	R	S	S	I	I	I	S	I	S	S	Non-MDR	NO	2	12	0.2
Bolari East	B001	B001	-	+	-	+	-	+	+	-	Y	Y	-	+	Klebsiella pneumoniae	R	R	R	R	S	R	R	R	S	R	R	S	MDR	YES	9	12	0.8
Bolari East	B002	B002	-	+	-	+	-	+	+	-	Y	Y	-	+	E. coli	R	R	I	S	R	R	I	R	R	S	R	S	MDR	YES	6	12	0.5
Bolari East	B003	B003	-	+	-	+	-	+	+	-	Y	Y	-	+	E. coli	R	R	R	R	R	R	R	R	R	R	R	I	MDR	YES	11	12	0.9
Bolari East	B004	B004	-	+	-	+	-	+	+	-	Y	Y	-	+	E. coli	S	S	S	S	S	I	R	I	S	I	S	S	Non-MDR	NO	1	12	0.1
Bolari East	B005	B005	-	+	-	+	-	+	+	w	Y	Y	-	+	Klebsiella oxytoca	S	R	S	S	S	S	S	S	S	S	R	S	Non-MDR	NO	2	12	0.2
Bolari East	B006	B006	-	+	-	+	-	+	+	-	Y	Y	-	+	Klebsiella pneumoniae	R	R	R	R	R	R	R	R	R	R	R	R	MDR	YES	12	12	1
Bolari East	B007	B007	-	+	-	+	-	+	+	-	Y	Y	-	+	E. coli	S	S	S	S	S	S	S	R	S	S	S	S	Non-MDR	NO	1	12	0.1
Bolari East	B008	B008	-	+	-	+	-	+	+	-	Y	Y	-	+	E. coli	R	R	R	S	R	R	R	R	S	S	R	S	MDR	YES	8	12	0.7
Bolari East	B009	B009	-	-	-	+	-	+	-	-	R	Y	w	-	Salmonella spp	R	S	R	S	S	R	R	S	I	R	R	S	MDR	YES	6	12	0.5
Bolari East	B010	B010	-	-	+	+	-	+	-	+	R	Y	+	+	Proteus mirabilis	R	R	R	R	R	R	R	R	R	R	R	R	MDR	YES	12	12	1
Bolari East	B011	B011	-	+	-	+	-	+	+	-	Y	Y	-	+	E. coli	R	R	R	S	R	R	R	S	I	S	R	S	MDR	YES	7	12	0.6
Bolari East	B012	B012	-	+	-	+	-	+	+	w	Y	Y	-	+	Klebsiella oxytoca	R	R	R	S	I	R	R	R	R	R	R	R	MDR	YES	10	12	0.8
Bolari East	B013	B013	-	+	-	+	-	+	+	-	Y	Y	-	+	E. coli	I	R	I	S	S	I	S	I	S	S	I	S	Non-MDR	NO	1	12	0.1
Bolari East	B014	B014	-	-	-	+	-	+	-	-	R	Y	w	-	Salmonella spp	R	R	R	S	S	I	R	R	R	R	R	S	MDR	YES	8	12	0.7
Bolari East	B015	B015	-	+	-	+	-	+	+	-	Y	Y	-	+	Klebsiella pneumoniae	I	S	R	S	I	S	I	S	S	S	R	S	Non-MDR	NO	2	12	0.2
Bolari East	B016	B016	-	+	-	+	-	+	+	-	Y	Y	-	+	E. coli	R	I	I	S	S	I	I	R	R	R	I	S	MDR	YES	4	12	0.3
Bolari East	B017	B017	-	+	-	+	-	+	+	-	Y	Y	-	+	Klebsiella pneumoniae	I	S	R	S	S	R	R	R	S	R	R	S	MDR	YES	6	12	0.5
Bolari East	B018	B018	-	+	+	-	-	+	-	-	Y	Y	-	-	Enterobacter spp	S	S	S	S	S	S	R	R	R	S	S	S	Non-MDR	NO	3	12	0.3
Bolari East	B019	B019	-	+	-	+	-	+	+	-	Y	Y	-	+	E. coli	R	R	R	R	S	R	R	R	S	R	R	S	MDR	YES	9	12	0.8
Bolari East	B020	B020	-	-	-	+	-	-	-	-	R	Y	-	-	Shigella spp	R	R	R	S	S	S	I	I	S	I	R	S	MDR	YES	4	12	0.3
Bolari East	B021	B021	-	+	-	+	-	+	+	-	Y	Y	-	+	Klebsiella pneumoniae	R	R	R	R	S	R	R	R	R	R	R	S	MDR	YES	10	12	0.8
Bolari East	B022	B022	-	-	+	-	+	+	-	+	R	Y	-	-	Pseudomonas aeruginosa	I	R	R	R	S	R	S	I	R	R	R	S	MDR	YES	7	12	0.6
Bolari East	B023	B023	-	-	+	+	-	+	-	+	R	Y	+	+	Proteus mirabilis	S	R	I	S	S	R	I	R	R	R	S	S	MDR	YES	5	12	0.4
Bolari East	B024	B024	-	+	-	+	-	+	+	w	Y	Y	-	+	Klebsiella oxytoca	R	R	R	R	S	R	R	R	R	R	R	R	MDR	YES	11	12	0.9
Bolari East	B025	B025	-	-	+	-	+	+	-	+	R	Y	-	-	Pseudomonas aeruginosa	I	I	S	S	S	R	I	R	I	R	R	S	MDR	YES	4	12	0.3
Bolari East	B026	B026	-	-	+	-	+	+	-	+	R	Y	-	-	Pseudomonas aeruginosa	S	S	I	S	S	S	I	S	S	S	S	S	Non-MDR	NO	0	12	0
Bolari East	B027	B027	-	+	-	+	-	+	+	-	Y	Y	-	+	E. coli	R	R	R	S	S	R	R	R	I	R	R	S	MDR	YES	8	12	0.7
Bolari East	B028	B028	-	+	-	+	-	+	+	-	Y	Y	-	+	E. coli	I	S	S	S	S	I	I	R	S	S	I	S	Non-MDR	NO	1	12	0.1
Bolari East	B029	B029	-	-	-	+	-	+	-	-	R	Y	w	-	Salmonella spp	I	R	R	S	S	I	I	R	S	I	R	S	MDR	YES	4	12	0.3
Bolari East	B030	B030	-	+	+	-	-	+	-	-	Y	Y	-	-	Enterobacter spp	R	R	R	I	S	I	R	R	R	R	S	S	MDR	YES	7	12	0.6
Bolari East	B031	B031	-	-	-	+	-	+	-	-	R	Y	w	-	Salmonella spp	I	R	I	I	S	R	S	R	R	I	R	S	MDR	YES	4	12	0.3
Bolari East	B032	B032	-	+	-	+	-	+	+	-	Y	Y	-	+	Klebsiella pneumoniae	R	I	S	I	S	I	I	R	R	R	R	S	MDR	YES	5	12	0.4
Bolari East	B033	B033	-	+	-	+	-	+	+	-	Y	Y	-	+	E. coli	R	I	I	R	R	S	S	I	I	S	S	R	MDR	YES	4	12	0.3
Bolari East	B034	B034	-	+	-	+	-	+	+	-	Y	Y	-	+	Klebsiella pneumoniae	R	R	R	R	I	R	R	R	R	R	R	S	MDR	YES	10	12	0.8
Bolari East	B035	B035	-	-	+	+	-	+	-	+	R	Y	+	+	Proteus mirabilis	I	S	S	S	S	I	S	S	S	S	R	S	Non-MDR	NO	1	12	0.1
Bolari East	B036	B036	-	-	+	+	-	+	+	+	R	Y	+	+	Proteus vulgaris	R	R	S	S	S	S	S	I	S	R	S	S	Non-MDR	NO	3	12	0.3
Bolari East	B037	B037	-	-	-	+	-	+	-	-	R	Y	w	-	Salmonella spp	R	R	R	S	S	R	R	S	R	R	R	S	MDR	YES	8	12	0.7
Bolari East	B038	B038	-	-	+	-	+	+	-	+	R	Y	-	-	Pseudomonas aeruginosa	R	S	R	S	R	R	R	R	R	S	R	S	MDR	YES	8	12	0.7
Bolari East	B039	B039	-	-	-	+	-	-	-	-	R	Y	-	-	Shigella spp	R	R	R	R	R	R	R	R	R	R	R	I	MDR	YES	11	12	0.9
Bolari East	B040	B040	-	+	-	+	-	+	+	-	Y	Y	-	+	E. coli	S	R	S	S	S	S	S	S	R	R	I	S	MDR	YES	1	12	0.1
Bolari East	B041	B041	-	+	-	+	-	+	+	-	Y	Y	-	+	Klebsiella pneumoniae	S	S	S	S	S	R	S	S	I	S	S	S	Non-MDR	NO	1	12	0.1
Bolari East	B042	B042	-	+	-	+	-	+	+	-	Y	Y	-	+	Klebsiella pneumoniae	R	S	S	S	S	I	I	S	S	S	S	S	Non-MDR	NO	1	12	0.1
Bolari East	B043	B043	-	-	+	-	+	+	-	+	R	Y	-	-	Pseudomonas aeruginosa	S	S	S	R	R	R	S	R	R	S	S	S	MDR	YES	5	12	0.4
Bolari East	B044	B044	-	+	-	+	-	+	+	-	Y	Y	-	+	Klebsiella pneumoniae	S	S	S	R	R	R	S	R	S	S	S	S	MDR	YES	4	12	0.3
Bolari East	B045	B045	-	+	-	+	-	+	+	-	Y	Y	-	+	E. coli	R	R	R	R	S	S	R	R	R	R	R	S	MDR	YES	9	12	0.8
Bolari East	B046	B046	-	+	-	+	-	+	+	-	Y	Y	-	+	Klebsiella pneumoniae	R	R	R	R	R	R	R	R	R	R	R	R	MDR	YES	12	12	1
Bolari East	B003	B047	-	-	-	+	-	+	-	-	R	Y	w	-	Salmonella spp	R	R	R	S	S	R	I	R	S	R	S	S	MDR	YES	6	12	0.5
Bolari East	B008	B048	-	-	+	+	-	+	+	+	R	Y	+	+	Proteus vulgaris	I	R	R	I	S	R	R	R	I	R	R	R	MDR	YES	8	12	0.7
Bolari East	B017	B049	-	+	-	+	-	+	+	-	Y	Y	-	+	E. coli	I	S	S	S	S	I	I	R	S	S	I	S	Non-MDR	NO	1	12	0.1
Bolari East	B025	B050	-	+	-	+	-	+	+	-	Y	Y	-	+	E. coli	R	S	R	S	R	I	R	S	R	S	R	S	MDR	YES	6	12	0.5
Bolari East	B036	B051	-	+	+	-	-	+	-	-	Y	Y	-	-	Enterobacter spp	R	R	I	S	S	R	R	S	R	I	R	S	MDR	YES	6	12	0.5
Bolari East	B042	B052	-	+	-	+	-	+	+	-	Y	Y	-	+	E. coli	R	R	R	S	S	R	R	S	R	I	I	S	MDR	YES	6	12	0.5
Bolari East	B044	B053	-	+	-	+	-	+	+	w	Y	Y	-	+	Klebsiella oxytoca	R	S	S	S	S	R	I	S	S	S	S	S	Non-MDR	NO	2	12	0.2
